# Supplementary material
Source: publisher site journal article supplement (https://static.cambridge.org/content/id/urn:cambridge.org:id:article:S1935789321001440/resource/name/S1935789321001440supp001.xlsx)
Supplement: Supplementary file 1 [file S1935789321001440supp001.xlsx]

## Sheet: FDMA
Report #	DateTime	Day	Time	Death	ddeath	Ddeaths	Missing	dmissing	Casualty	Total Injury	dinjury	Severe	Mild	Indirect	Evacuees	na	Black	Fukushima na	Remark
2	2011-03-11 15:30:00	1.03056	0:44:00	0		0			0	0		0	0	0							2011-03-11
3	2011-03-11 16:10:00	1.05833	1:24:00	0	0	0	0	0	0	0	0	0	0	0							2011-03-11 14:46:00
4	2011-03-11 16:30:00	1.07222	1:44:00	0	0	0	0	0	0	0	0	0	0	0
5	2011-03-11 17:00:00	1.09306	2:14:00	5	5	5	0	0	5	0	0	0	0	0
6	2011-03-11 17:30:00	1.11389	2:44:00	5	0	5	0	0	5	0	0	0	0	0
7	2011-03-11 18:00:00	1.13472	3:14:00	5	0	5	0	0	5	0	0	0	0	0
8	2011-03-11 18:30:00	1.15556	3:44:00	8	3	8	0	0	8	6	6	0	0	0
9	2011-03-11 19:00:00	1.17639	4:14:00	9	1	9	0	0	9	12	6	2	3	0		7	2
10	2011-03-11 19:30:00	1.19722	4:44:00	10	1	10	0	0	10	12	0	2	3	0		7	2
11	2011-03-11 20:00:00	1.21806	5:14:00	20	10	20	0	0	20	13	1	2	4	0		7	2
12	2011-03-11 21:00:00	1.25972	6:14:00	22	2	22	0	0	22	43	30	6	31	0		7	2		不一致
13	2011-03-11 22:00:00	1.30139	7:14:00	22	0	22	2	2	24	43	0	6	38	0		1	2		不一致
14	2011-03-11 23:30:00	1.36389	8:44:00	25	3	25	143	141	168	117	74	17	104	0			2		不一致
15	2011-03-12 01:00:00	1.42639	10:14:00	39	14	39	149	6	188	243	126			0
16	2011-03-12 05:00:00	1.59306	14:14:00	91	52	91	205	56	296	755	512	118	414	0
17	2011-03-12 06:20:00	1.64861	15:34:00	154	63	154	242	37	396	874	119	125	521	0
18	2011-03-12 07:00:00	1.67639	16:14:00	164	10	164	258	16	422	1027	153	126	535	0
19	2011-03-12 08:30:00	1.73889	17:44:00	164	0	164	258	0	422	1087	60	132	581	0
20	2011-03-12 10:15:00	1.81181	19:29:00	165	1	165	255	-3	420	1208	121	137	694	0
21	2011-03-12 12:00:00	1.88472	21:14:00	164	-1	164	257	2	421	1416	208	137	699	0
22	2011-03-12 14:00:00	1.96806	23:14:00	166	2	166	257	0	423	1433	17	137	717	0
23	2011-03-12 16:00:00	2.05139	1 day, 1:14:00	180	14	180	318	61	498	1604	171			0			145.668
24	2011-03-12 20:00:00	2.21806	1 day, 5:14:00	286	106	286	441	123	727	1837	233	215	1068	0
25	2011-03-12 23:00:00	2.34306	1 day, 8:14:00	389	103	389	627	186	1016	1928	91	234	1040	0
26	2011-03-13 07:00:00	2.67639	1 day, 16:14:00	391	2	391	627	0	1018	1929	1	235	1040	0
27	2011-03-13 10:00:00	2.80139	1 day, 19:14:00	393	2	393	1535	908	1928	1920	-9	244	1051	0
28	2011-03-13 13:00:00	2.92639	1 day, 22:14:00	535	142	535	1436	-99	1971	1460	-460	247	1063	0
29	2011-03-13 16:00:00	3.05139	2 days, 1:14:00	546	11	546	1456	20	2002	1453	-7	245	1085	0
30	2011-03-13 23:30:00	3.36389	2 days, 8:44:00	826	280	826	1834	378	2660	2002	549	292	1163	0
31	2011-03-14 06:30:00	3.65556	2 days, 15:44:00	865	39	865	1847	13	2712	2005	3	308	1171	0
32	2011-03-14 08:30:00	3.73889	2 days, 17:44:00	866	1	866	1895	48	2761	2137	132	325	1181	0
33	2011-03-14 10:30:00	3.82222	2 days, 19:44:00	866	0	866	1895	0	2761	2151	14	325	1181	0
34	2011-03-14 11:30:00	3.86389	2 days, 20:44:00	877	11	877	1885	-10	2762	2150	-1	325	1180	0					サマリーには2151
35	2011-03-14 13:30:00	3.94722	2 days, 22:44:00	1011	134	1011	2000	115	3011	2766	616	324	1198	0
36	2011-03-14 15:30:00	4.03056	3 days, 0:44:00	1012	1	1012	1950	-50	2962	2535	-231	322	1193	0
37	2011-03-14 17:30:00	4.11389	3 days, 2:44:00	1012	0	1012	1950	0	2962	2535	0	322	1193	0
38	2011-03-14 19:30:00	4.19722	3 days, 4:44:00	1012	0	1012	1950	0	2962	2542	7	322	1200	0
39	2011-03-14 23:00:00	4.34306	3 days, 8:14:00	1154	142	1154	1956	6	3110	2650	108	230	1403	0
40	2011-03-15 06:30:00	4.65556	3 days, 15:44:00	1154	0	1154	1956	0	3110	2650	0	230	1403	0
41	2011-03-15 11:30:00	4.86389	3 days, 20:44:00	1470	316	1470	4947	2991	6417	2069	-581	233	1415	0
42	2011-03-15 15:30:00	5.03056	4 days, 0:44:00	1486	16	1486	4977	30	6463	2084	15	303	1428	0
43	2011-03-15 18:30:00	5.15556	4 days, 3:44:00	1820	334	1820	5798	821	7618	1672	-412	275	1415	0
44	2011-03-15 20:30:00	5.23889	4 days, 5:44:00	1820	0	1820	5798	0	7618	1672	0	275	1415	0
45	2011-03-15 23:00:00	5.34306	4 days, 8:14:00	1820	0	1820	5799	1	7619	1668	-4	267	1434	0
46	2011-03-16 06:30:00	5.65556	4 days, 15:44:00	2142	322	2142	6591	792	8733	2077	409	264	1504	0
47	2011-03-16 10:30:00	5.82222	4 days, 19:44:00	2306	164	2306	6883	292	9189	2188	111	266	1538	0
48	2011-03-16 13:30:00	5.94722	4 days, 22:44:00	2694	388	2694	7222	339	9916	2189	1	266	1658	0
49	2011-03-16 18:00:00	6.13472	5 days, 3:14:00	2720	26	2720	7232	10	9952	2226	37	268	1693	0
50	2011-03-16 22:00:00	6.30139	5 days, 7:14:00	2722	2	2722	7228	-4	9950	2253	27	269	1696	0
51	2011-03-17 07:00:00	6.67639	5 days, 16:14:00	3257	535	3257	7478	250	10735	2332	79	388	1664	0
52	2011-03-17 11:00:00	6.84306	5 days, 20:14:00	3473	216	3473	7355	-123	10828	2333	1	400	1753	0
53	2011-03-17 15:30:00	7.03056	6 days, 0:44:00	3473	0	3473	7353	-2	10826	2576	243	399	1754	0
54	2011-03-17 20:30:00	7.23889	6 days, 5:44:00	3549	76	3549	7276	-77	10825	2517	-59	405	1825	0
55	2011-03-18 07:00:00	7.67639	6 days, 16:14:00	3549	0	3549	7277	1	10826	2517	0	405	1825	0
56	2011-03-18 11:30:00	7.86389	6 days, 20:44:00	3617	68	3617	7762	485	11379	2517	0	405	1825	0
57	2011-03-18 17:00:00	8.09306	7 days, 2:14:00	3685	68	3685	7409	-353	11094	2525	8	405	1833	0
58	2011-03-18 22:00:00	8.30139	7 days, 7:14:00	3870	185	3398	8437	1028	12307	2679	154	393	2154	472
59	2011-03-19 01:00:00	8.42639	7 days, 10:14:00	3870	0	3870	8437	0	12307	2679	0	393	2154	0
60	2011-03-19 08:30:00	8.73889	7 days, 17:44:00	3870	0	3870	8437	0	12307	2680	1	394	2154	0
61	2011-03-19 17:30:00	9.11389	8 days, 2:44:00	3875	5	3875	8421	-16	12296	2711	31	394	2185	0
62	2011-03-19 22:00:00	9.30139	8 days, 7:14:00	4656	781	4656	8008	-413	12664	2678	-33	394	2188	0
63	2011-03-20 09:00:00	9.75972	8 days, 18:14:00	4656	0	4656	8008	0	12664	2678	0	394	2188	0
64	2011-03-20 17:00:00	10.0931	9 days, 2:14:00	7288	2632	7288	10004	1996	17292	2936	258	444	2169	0
65	2011-03-20 21:00:00	10.2597	9 days, 6:14:00	7820	532	7820	10131	127	17951	3024	88	453	2248	0
66	2011-03-21 10:30:00	10.8222	9 days, 19:44:00	7820	0	7820	10131	0	17951	3024	0	453	2248	0
67	2011-03-21 14:00:00	10.9681	9 days, 23:14:00	8019	199	8019	10512	381	18531	2928	-96	481	2167	0
68	2011-03-21 20:30:00	11.2389	10 days, 5:44:00	8078	59	8078	10507	-5	18585	2949	21	483	2185	0
69	2011-03-22 07:00:00	11.6764	10 days, 16:14:00	8199	121	8199	10507	0	18706	2949	0	483	2185	0
70	2011-03-22 10:30:00	11.8222	10 days, 19:44:00	7949	-250	7949	10059	-448	18008	3018	69	485	2207	0
71	2011-03-22 15:30:00	12.0306	11 days, 0:44:00	8086	137	8086	10173	114	18259	3018	0	485	2207	0
72	2011-03-22 20:30:00	12.2389	11 days, 5:44:00	8086	0	8086	10165	-8	18251	3027	9	483	2218	0
73	2011-03-23 09:00:00	12.7597	11 days, 18:14:00	8110	24	8110	10944	779	19054	3029	2	483	2260	0
74	2011-03-23 15:30:00	13.0306	12 days, 0:44:00	8457	347	8457	11867	923	20324	3054	25	508	2260	0
75	2011-03-23 20:00:00	13.2181	12 days, 5:14:00	8682	225	8682	11796	-71	20478	3093	39	510	2286	0
76	2011-03-24 08:30:00	13.7389	12 days, 17:44:00	8810	128	8810	12786	990	21596	3105	12	512	2287	0
77	2011-03-24 15:30:00	14.0306	13 days, 0:44:00	9353	543	9353	13266	480	22619	3105	0	521	2287	0
78	2011-03-24 19:30:00	14.1972	13 days, 4:44:00	9454	101	9454	13188	-78	22642	3104	-1	519	2288	0
79	2011-03-25 07:30:00	14.6972	13 days, 16:44:00	9468	14	9468	13188	0	22656	3104	0	519	2288	0
80	2011-03-25 18:30:00	15.1556	14 days, 3:44:00	9470	2	9470	13147	-41	22617	3117	13	520	2300	0
81	2011-03-26 11:30:00	15.8639	14 days, 20:44:00	9564	94	9564	13111	-36	22675	3115	-2	520	2298	0
82	2011-03-26 19:30:00	16.1972	15 days, 4:44:00	9610	46	9610	12975	-136	22585	3119	4	524	2299	0
83	2011-03-27 10:00:00	16.8014	15 days, 19:14:00	9654	44	9654	12953	-22	22607	3119	0	524	2299	0
84	2011-03-27 19:30:00	17.1972	16 days, 4:44:00	10242	588	10242	12340	-613	22582	3002	-117	313	2303	0
85	2011-03-28 11:00:00	17.8431	16 days, 20:14:00	10322	80	10322	13800	1460	24122	3003	1	313	2304	0
86	2011-03-28 19:00:00	18.1764	17 days, 4:14:00	10326	4	10326	13796	-4	24122	3004	1	313	2305	0
87	2011-03-29 11:30:00	18.8639	17 days, 20:44:00	10469	143	10469	13742	-54	24211	3006	2	313	2306	0
88	2011-03-30 12:00:00	19.8847	18 days, 21:14:00	10882	413	10882	13005	-737	23887	3020	14	314	2319	0
89	2011-03-31 14:00:00	20.9681	19 days, 23:14:00	10977	95	10977	12995	-10	23972	3031	11	315	2329	0	209468
90	2011-04-01 11:00:00	21.8431	20 days, 20:14:00	11075	98	11075	13038	43	24113	3031	0	315	2329	0	209686
91	2011-04-02 11:00:00	22.8431	21 days, 20:14:00	11218	143	11218	13219	181	24437	3034	3	314	2303	0	206496			26706
92	2011-04-03 11:00:00	23.8431	22 days, 20:14:00	11306	88	11306	13159	-60	24465	3034	0	316	2303	0	206398			28833
93	2011-04-04 11:00:00	24.8431	23 days, 20:14:00	11703	397	11703	12344	-815	24047	3032	-2	316	2301	0	205793			29849
94	2011-04-05 11:00:00	25.8431	24 days, 20:14:00	11920	217	11920	12264	-80	24184	3013	-19	316	2301	0	195121			30075
95	2011-04-06 11:00:00	26.8431	25 days, 20:14:00	11951	31	11951	12336	72	24287	3013	0	316	2301	0	194679			31585
96	2011-04-07 11:00:00	27.8431	26 days, 20:14:00	12290	339	12290	12607	271	24897	4371	1358	316	2325	0	188033			39782
97	2011-04-08 11:00:00	28.8431	27 days, 20:14:00	12392	102	12392	12491	-116	24883	4391	20	322	2338	0	188212			31858
98	2011-04-09 12:00:00	29.8847	28 days, 21:14:00	12453	61	12453	12811	320	25264	4388	-3	321	2339	0	188438			31324
99	2011-04-10 10:00:00	30.8014	29 days, 19:14:00	12590	137	12590	12806	-5	25396	4816	428	339	2520	0	191660			31648
100	2011-04-11 11:00:00	31.8431	30 days, 20:14:00	12875	285	11660	12555	-251	25430	5022	206	346	2613	1215	190445			31176
101	2011-04-12 11:00:00	32.8431	31 days, 20:14:00	12950	75	12950	13133	578	26083	5060	38	343	2651	0	184319			32524
102	2011-04-13 15:00:00	34.0097	33 days, 0:14:00	13060	110	13060	13539	406	26599	5183	123	353	2781	0	182341			32896
103	2011-04-14 07:00:00	34.6764	33 days, 16:14:00	13134	74	13134	13492	-47	26626	5047	-136	346	2599	0	182122			32988
104	2011-04-15 07:00:00	35.6764	34 days, 16:14:00	13269	135	13269	13428	-64	26697	5044	-3	346	2596	0	182245			32651
105	2011-04-16 16:00:00	37.0514	36 days, 1:14:00	13364	95	13364	13473	45	26837	5043	-1	347	2593	0	180277			31666
106	2011-04-17 11:00:00	37.8431	36 days, 20:14:00	13540	176	13540	13252	-221	26792	5054	11	347	2602	0	179250			31255
107	2011-04-18 07:00:00	38.6764	37 days, 16:14:00	13533	-7	13533	13221	-31	26754	5054	0	347	2602	0	179255			31403
108	2011-04-19 11:00:00	39.8431	38 days, 20:14:00	13619	86	13619	13172	-49	26791	5054	0	327	2622	0	177832			31150
109	2011-04-20 11:00:00	40.8431	39 days, 20:14:00	13643	24	13643	13377	205	27020	5417	363	327	2622	0	176342			30369
110	2011-04-21 11:00:00	41.8431	40 days, 20:14:00	13801	158	13801	12925	-452	26726	5430	13	326	2625	0	174343			30397
111	2011-04-22 11:00:00	42.8431	41 days, 20:14:00	13885	84	13885	12726	-199	26611	5436	6	333	2624	0	170962			29614
112	2011-04-25 11:00:00	45.8431	44 days, 20:14:00	14006	121	14006	11828	-898	25834	5445	9	336	2654	0	168783			26973	weekday only
113	2011-04-26 11:00:00	46.8431	45 days, 20:14:00	14117	111	14117	11674	-154	25791	5445	0	336	2654	0	166820			26847
114	2011-04-27 11:00:00	47.8431	46 days, 20:14:00	14161	44	14161	11536	-138	25697	5446	1	342	2649	0	166843			26230
115	2011-04-28 11:00:00	48.8431	47 days, 20:14:00	14337	176	14337	11429	-107	25766	5417	-29	339	2624	0	168901			26988
116	2011-05-02 11:00:00	52.8431	51 days, 20:14:00	14482	145	14482	11031	-398	25513	5416	-1	338	2624	0	166671			23445
117	2011-05-06 11:00:00	56.8431	55 days, 20:14:00	14654	172	14654	10124	-907	24778	5427	11	292	2682	0	164412			23503
118	2011-05-09 11:00:00	59.8431	58 days, 20:14:00	14737	83	14737	9992	-132	24729	5427	0	292	2682	0	155410			23567
119	2011-05-10 11:00:00	60.8431	59 days, 20:14:00	14786	49	14786	9982	-10	24768	5427	0	292	2682	0	169441			39037
120	2011-05-11 11:00:00	61.8431	60 days, 20:14:00	14807	21	14807	9969	-13	24776	5445	18	293	2697	0	168184			39692
121	2011-05-12 11:00:00	62.8431	61 days, 20:14:00	14812	5	14812	9895	-74	24707	5446	1	294	2697	0	167718			39710
122	2011-05-13 11:00:00	63.8431	62 days, 20:14:00	14828	16	14828	9649	-246	24477	5444	-2	294	2695	0	171519			38615
123	2011-05-16 11:00:00	66.8431	65 days, 20:14:00	14870	42	14870	9095	-554	23965	5444	0	294	2695	0	171508			39565
124	2011-05-19 11:00:00	69.8431	68 days, 20:14:00	14928	58	14928	9041	-54	23969	5462	18	294	2713	0	165383			40745	twice a week
125	2011-05-26 11:00:00	76.8431	75 days, 20:14:00	15073	145	15073	8657	-384	23730	5472	10	569	4720	0	158738			39208	weekly
126	2011-06-02 11:00:00	83.8431	82 days, 20:14:00	15186	113	15186	8353	-304	23539	5494	22	591	4717	0	154486			38616
127	2011-06-09 11:00:00	90.8431	89 days, 20:14:00	15240	54	15240	8173	-180	23413	5494	0	591	4717	0	148582			40274
128	2011-06-16 15:00:00	98.0097	97 days, 0:14:00	15373	133	13476	7731	-442	23104	5517	23	593	4717	1897	142683			39431
129	2011-06-23 15:00:00	105.01	104 days, 0:14:00	15476	103	15476	7388	-343	22864	5563	46	606	4717	0	135553			38110
130	2011-06-30 19:00:00	112.176	111 days, 4:14:00	15680	204	15680	7121	-267	22801	5565	2	607	4718	0	116213			27849
131	2011-07-07 15:00:00	119.01	118 days, 0:14:00	15865	185	15865	7016	-105	22881	5866	301	622	5004	0	111532			27471
132	2011-07-14 15:00:00	126.01	125 days, 0:14:00	16011	146	16011	5242	-1774	21253	5869	3	624	5005	0	106962			27451
133	2011-07-21 15:00:00	133.01	132 days, 0:14:00	16058	47	16058	4879	-363	20937	5876	7	631	5005	0	100785			15503
134	2011-07-28 15:00:00	140.01	139 days, 0:14:00	16103	45	16103	4764	-115	20867	5877	1	633	5004	0	98011			14241
135	2011-08-04 17:00:00	147.093	146 days, 2:14:00	16447	344	16447	4787	23	21234	5888	11	637	5011	0	94553			15951
136	2011-08-11 18:00:00	154.135	153 days, 3:14:00	15810	-637	15810	4613	-174	20423	5896	8	638	5018	0	87285			12653
137	2011-08-25 18:00:00	168.135	167 days, 3:14:00	15863	53	15863	4414	-199	20277	5901	5	639	5022	0	78852			6008	every 2 weeks
138	2011-09-09 22:00:00	183.301	182 days, 7:14:00	15960	97	15960	4004	-410	19964	6110	209	654	5191	0	68596
139	2011-09-26 17:00:00	200.093	199 days, 2:14:00	15989	29	13622	3917	-87	19906	6115	5	658	5192	2367	66844
140	2011-10-11 17:00:00	215.093	214 days, 2:14:00	16019	30	16019	3805	-112	19824	6121	6	666	5190	0	65753
141	2011-11-29 17:00:00	264.093	263 days, 2:14:00	16079	60	16079	3499	-306	19578	6051	-70	676	5112	0	67387	263			以後monthlyはじめて負傷者合計が合う
142	2011-12-12 17:00:00	277.093	276 days, 2:14:00	16146	67	16146	3333	-166	19479	6052	1	677	5112	0	69668	263
143	2012-01-13 17:00:00	309.093	308 days, 2:14:00	16131	-15	16131	3240	-93	19371	5994	-58	612	5119	0	70077	263
144	2012-02-14 17:00:00	341.093	340 days, 2:14:00	16140	9	16140	3123	-117	19263	6112	118	674	5177	0	71124	261
145	2012-03-13 12:00:00	368.885	367 days, 21:14:00	16278	138	13476	2994	-129	19272	6179	67	684	5225	2802	72788	270
146	2012-09-28 17:00:00	568.093	567 days, 2:14:00	18131	1853	18131	2829	-165	20960	6194	15	694	5305	0	69891	195			1年以内関連死1,618		16513
147	2013-03-26 12:00:00	746.885	745 days, 21:14:00	18493	362	15282	2683	-146	21176	6217	23	697	5323	3211	66743	197			1年以内関連死2,263		16230
148	2013-09-09 13:00:00	913.926	912 days, 22:14:00	18703	210	18703	2674	-9	21377	6220	3	698	5325	0	61355	197
149	2014-03-07 13:00:00	1092.93	1091 days, 22:14:00	18958	255	15526	2655	-19	21613	6219	-1	697	5337	3432	56557	185
150	2014-09-10 14:00:00	1279.97	1278 days, 23:14:00	19074	116	19074	2633	-22	21707	6219	0	697	5337	0		185
151	2015-03-09 14:00:00	1459.97	1458 days, 23:14:00	19225	151	15692	2614	-19	21839	6219	0	697	5337	3533		185
152	2015-09-09 14:00:00	1643.97	1642 days, 23:14:00	19335	110	19335	2600	-14	21935	6219	0	697	5337	0		185
153	2016-03-08 14:00:00	1824.97	1823 days, 23:14:00	19418	83	15780	2592	-8	22010	6220	1	698	5337	3638		185
154	2016-10-20 14:00:00	2050.97	2049 days, 23:14:00	19475	57	19475	2587	-5	22062	6221	1	699	5337	0		185
155	2017-03-08 14:00:00	2189.97	2188 days, 23:14:00	19533	58	15841	2585	-2	22118	6230	9	700	5345	3692		185
156	2017-09-08 14:00:00	2373.97	2372 days, 23:14:00	19575	42	15861	2577	-8	22152	6230	0	700	5345	3714		185
157	2018-03-07 14:00:00	2553.97	2552 days, 23:14:00	19630	55	15906	2569	-8	22199	6230	0	700	5345	3724		185
158	2018-09-07 10:00:00	2737.8	2736 days, 19:14:00	19667	37	15934	2566	-3	22233	6231	1	700	5346	3733		185
159	2019-03-08 08:00:00	2919.72	2918 days, 17:14:00	19689	22	15951	2563	-3	22252	6233	2	700	5346	3738		187
160	2020-03-10 08:00:00	3287.72	3286 days, 17:14:00	19729	40	15990	2559	-4	22288	6233	0	700	5346	3739		187
			direct death	15990
													18549
